# Supplementary material for: A 9-year Trend in the Prevalence of Allergic Disease Based on National Health Insurance Data
Source: PubMed Central journal article supplement — J Prev Med Public Health. 2015 Nov 13;48(6):301–9. doi: 10.3961/jpmph.15.011 (PMC4676638; doi:10.3961/jpmph.15.011), 2015-11-13
Supplement: jpmph-48-6-301-supple1.pdf [file jpmph-48-6-301-supple1.pdf]

**Supplemental Table 1.** Prevalence (%) of allergic disease from 2003 to 2011

|                               | <b>2003</b> | <b>2004</b> | <b>2005</b> | <b>2006</b> | <b>2007</b> | <b>2008</b> | <b>2009</b> | <b>2010</b> | <b>2011</b> |
|-------------------------------|-------------|-------------|-------------|-------------|-------------|-------------|-------------|-------------|-------------|
| Allergic rhinitis outpatients | 1.27        | 1.48        | 1.65        | 1.80        | 2.02        | 2.29        | 2.83        | 2.85        | 2.97        |
| Allergic rhinitis inpatients  | 0.05        | 0.06        | 0.07        | 0.07        | 0.08        | 0.09        | 0.11        | 0.12        | 0.12        |
| Asthma outpatients            | 6.08        | 6.40        | 6.93        | 7.08        | 7.09        | 7.16        | 7.38        | 7.34        | 7.35        |
| Asthma inpatients             | 0.20        | 0.20        | 0.22        | 0.24        | 0.23        | 0.23        | 0.23        | 0.25        | 0.26        |
| Atopic dermatitis outpatients | 3.39        | 3.45        | 3.40        | 3.18        | 3.19        | 3.21        | 3.08        | 3.07        | 3.01        |
| Atopic dermatitis inpatients  | 0.0024      | 0.0024      | 0.0025      | 0.0033      | 0.0028      | 0.0026      | 0.0027      | 0.0025      | 0.0023      |
