# Supplementary material for: A 9-year Trend in the Prevalence of Allergic Disease Based on National Health Insurance Data
Source: PubMed Central journal article supplement — J Prev Med Public Health. 2015 Nov 13;48(6):301–9. doi: 10.3961/jpmph.15.011 (PMC4676638; doi:10.3961/jpmph.15.011), 2015-11-13
Supplement: jpmph-48-6-301-supple2.pdf [file jpmph-48-6-301-supple2.pdf]

**Supplemental Table 2.** Major regions with high statistics for variation, by disease

|                                      | <b>Region with highest EQ</b> | <b>Region with 2nd highest EQ</b> | <b>Region with highest CV</b> | <b>Region with 2nd highest CV</b> |
|--------------------------------------|-------------------------------|-----------------------------------|-------------------------------|-----------------------------------|
| Allergic rhinitis outpatients (2003) | Chungcheongnam-do             | Gyeonggi-do                       | Chungcheongnam-do             | Gyeonggi-do                       |
| Allergic rhinitis outpatients (2011) | Gyeongsangbuk-do              | Gyeongsangnam-do                  | Gyeongsangnam-do              | Gyeongsangbuk-do                  |
| Allergic rhinitis inpatients (2003)  | Chungcheongnam-do             | Gangwon-do                        | Chungcheongbuk-do             | Gangwon-do                        |
| Allergic rhinitis inpatients (2011)  | Gyeongsangbuk-do              | Gyeongsangnam-do                  | Gyeongsangbuk-do              | Jeollabuk-do                      |
| Asthma outpatients (2003)            | Chungcheongnam-do             | Chungcheongbuk-do                 | Chungcheongnam-do             | Chungcheongbuk-do                 |
| Asthma outpatients (2011)            | Gangwon-do                    | Gyeongsangbuk-do                  | Gangwon-do                    | Chungcheongbuk-do                 |
| Asthma inpatients (2003)             | Jeollabuk-do                  | Chungcheongnam-do                 | Jeollabuk-do                  | Gyeongsangbuk-do                  |
| Asthma inpatients (2011)             | Jeollanam-do                  | Gyeonggi-do                       | Gyeonggi-do                   | Ulsan                             |
| Atopic dermatitis outpatients (2003) | Chungcheongbuk-do             | Gyeongsangbuk-do                  | Chungcheongbuk-do             | Gyeongsangbuk-do                  |
| Atopic dermatitis outpatients (2011) | Chungcheongbuk-do             | Incheon                           | Chungcheongbuk-do             | Gangwon-do                        |
| Atopic dermatitis inpatients (2003)  | Seoul                         | Busan                             | Chungcheongbuk-do             | Gangwon-do                        |
| Atopic dermatitis inpatients (2011)  | Seoul                         | Daejeon                           | Gyeongsangnam-do              | Gangwon-do                        |

EQ, extremal quotient; CV, coefficient of variation.
