# Supplementary material for: A 9-year Trend in the Prevalence of Allergic Disease Based on National Health Insurance Data
Source: PubMed Central journal article supplement — J Prev Med Public Health. 2015 Nov 13;48(6):301–9. doi: 10.3961/jpmph.15.011 (PMC4676638; doi:10.3961/jpmph.15.011), 2015-11-13
Supplement: jpmph-48-6-301-supple3.pdf [file jpmph-48-6-301-supple3.pdf]

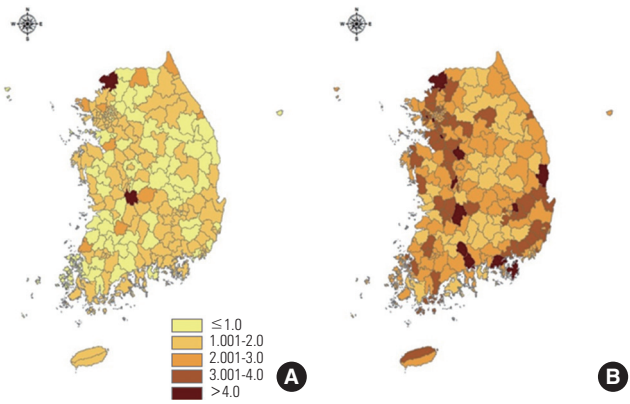

**Supplemental Figure 1.** Geographical distribution of annual outpatient prevalence for allergic rhinitis, by sub-region (A: 2003, B: 2011).
